# Supplementary material for: A Prospective Study on Deep Inspiration Breath Hold Thoracic Radiation Therapy Guided by Bronchoscopically Implanted Electromagnetic Transponders
Source: MDPI journal article supplement (doi:10.3390/cancers16081534), 2024-04-17
Supplement: s1 [file s1]

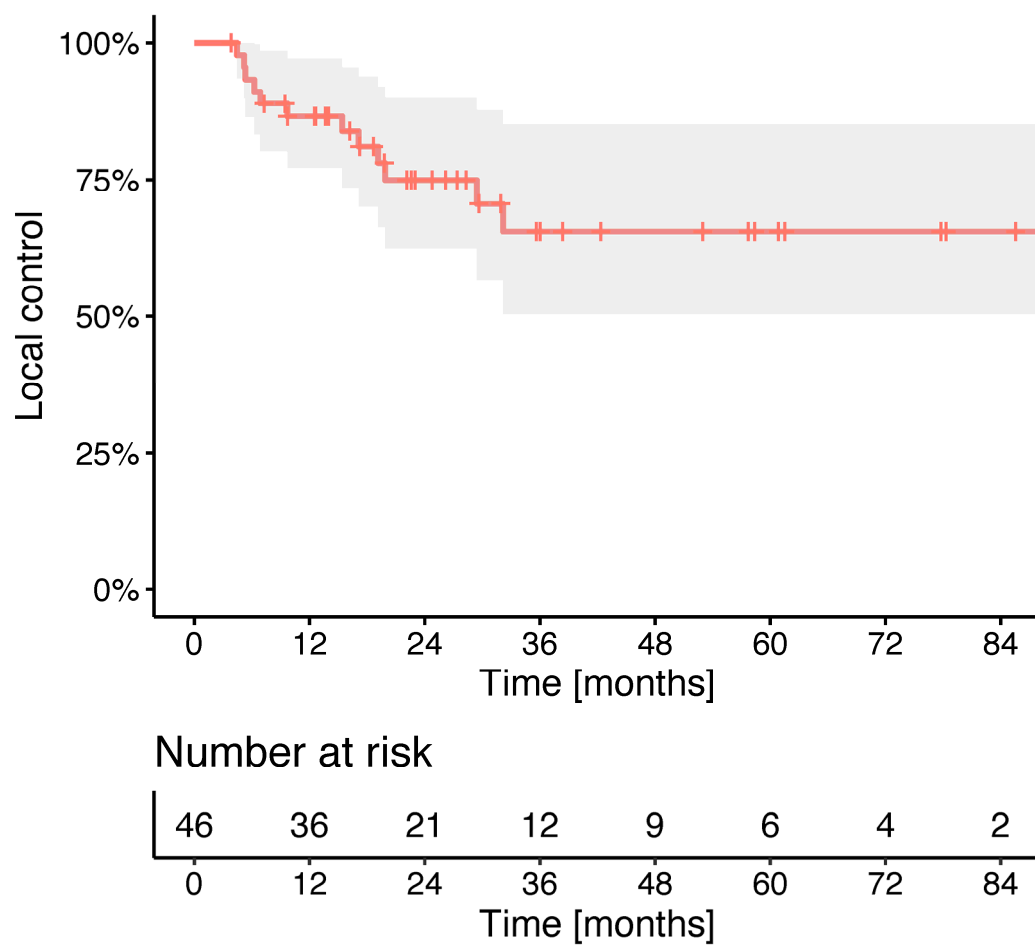

(a)

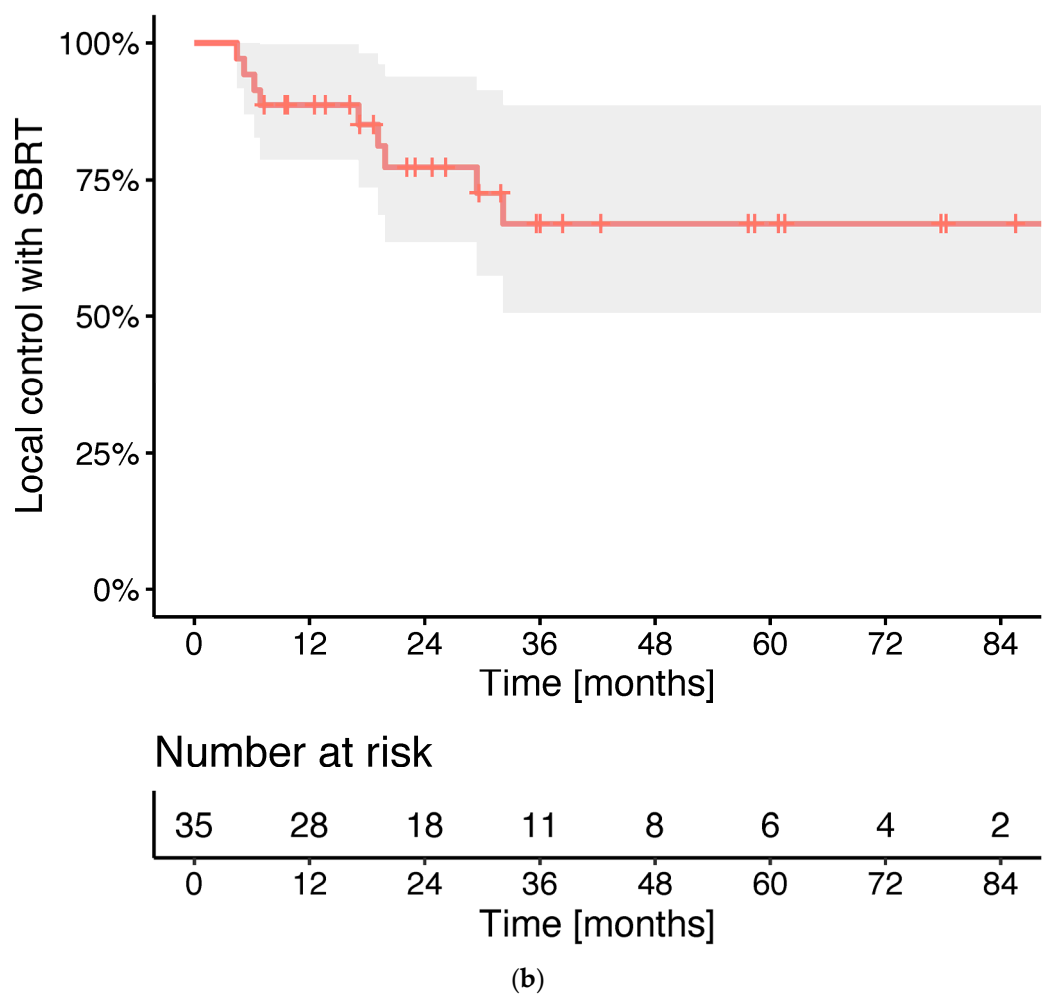

**Figure S1.** Kaplan–Meier plots of local control for (a) all patients treated with EMT-guided RT and (b) patients treated with EMT-guided stereotactic body RT (SBRT).
